# Supplementary material for: Shear wave reflection seismics yields subsurfacedissolution and subrosion patterns: application to theGhor Al-Haditha sinkhole site, Dead Sea, Jordan
Source: Copernicus journal article supplement (doi:10.5194/se-2018-22), 2018-04-25
Supplement: Supplementary file [file se-2018-22-AC1-supplement.zip]

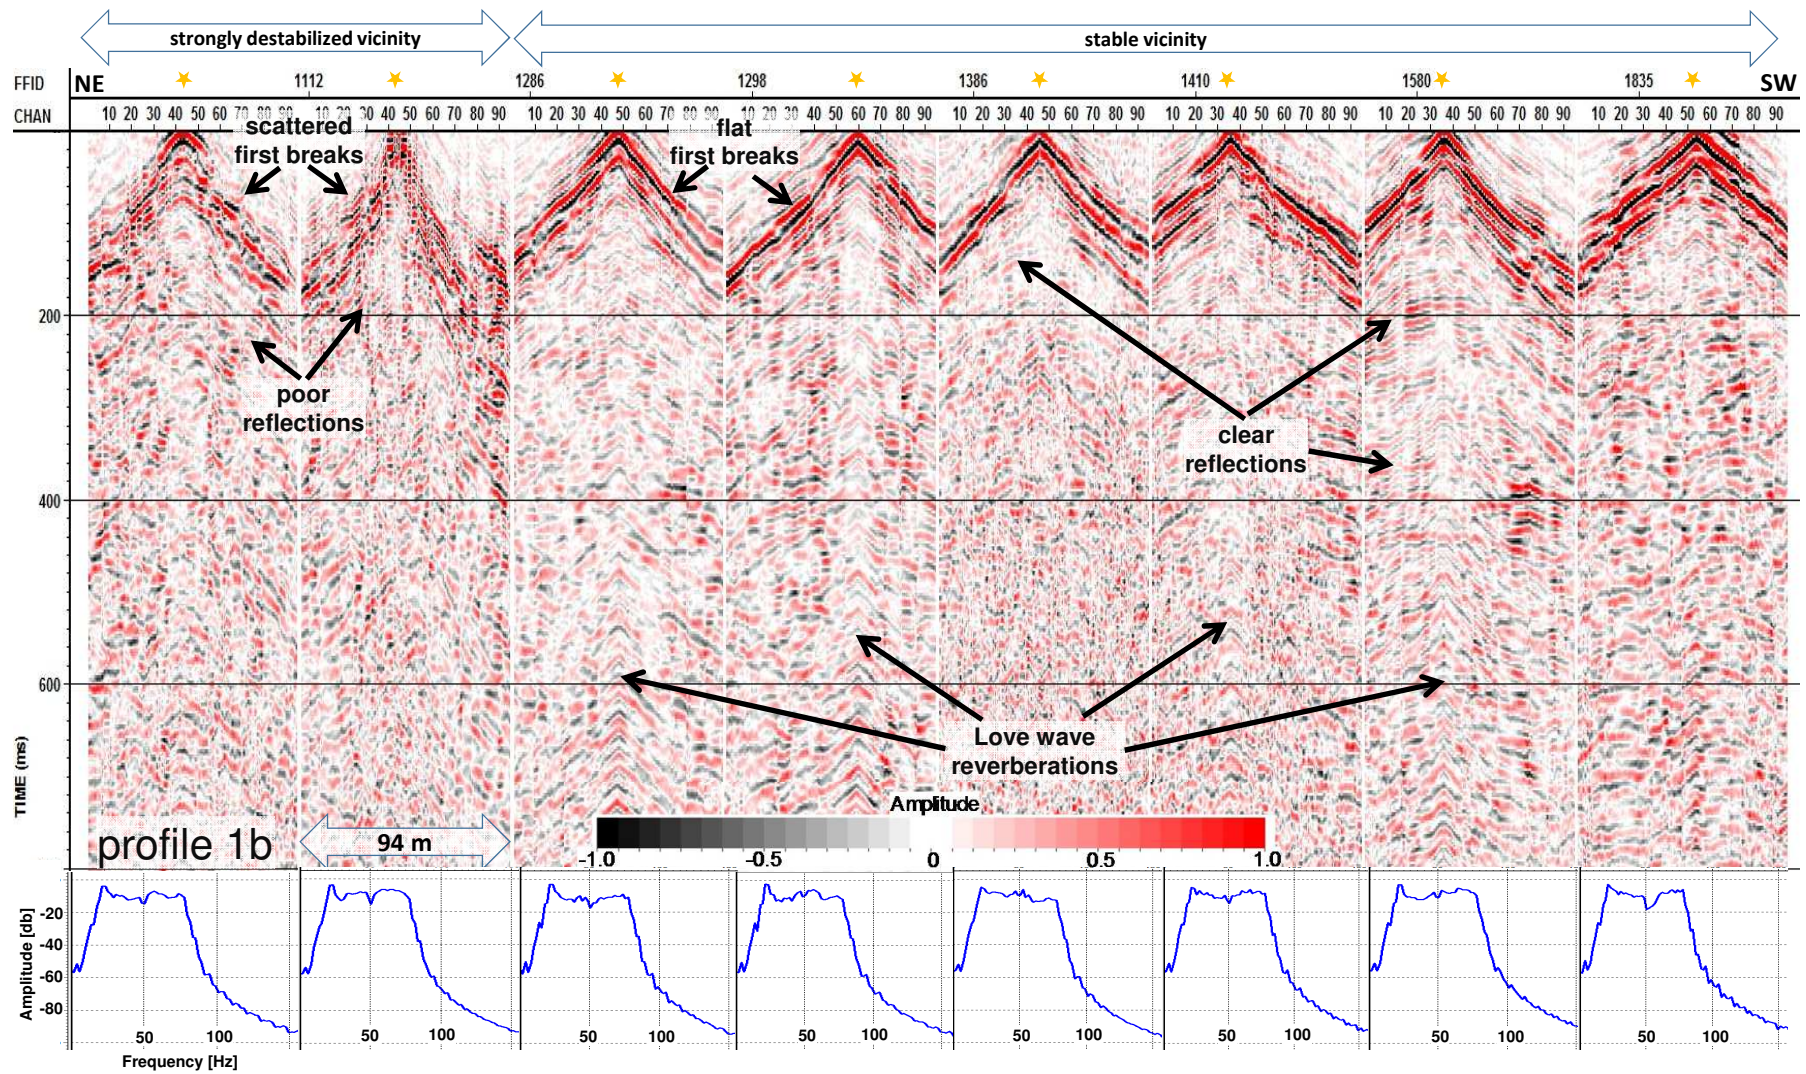

Polom et al., Figure 5



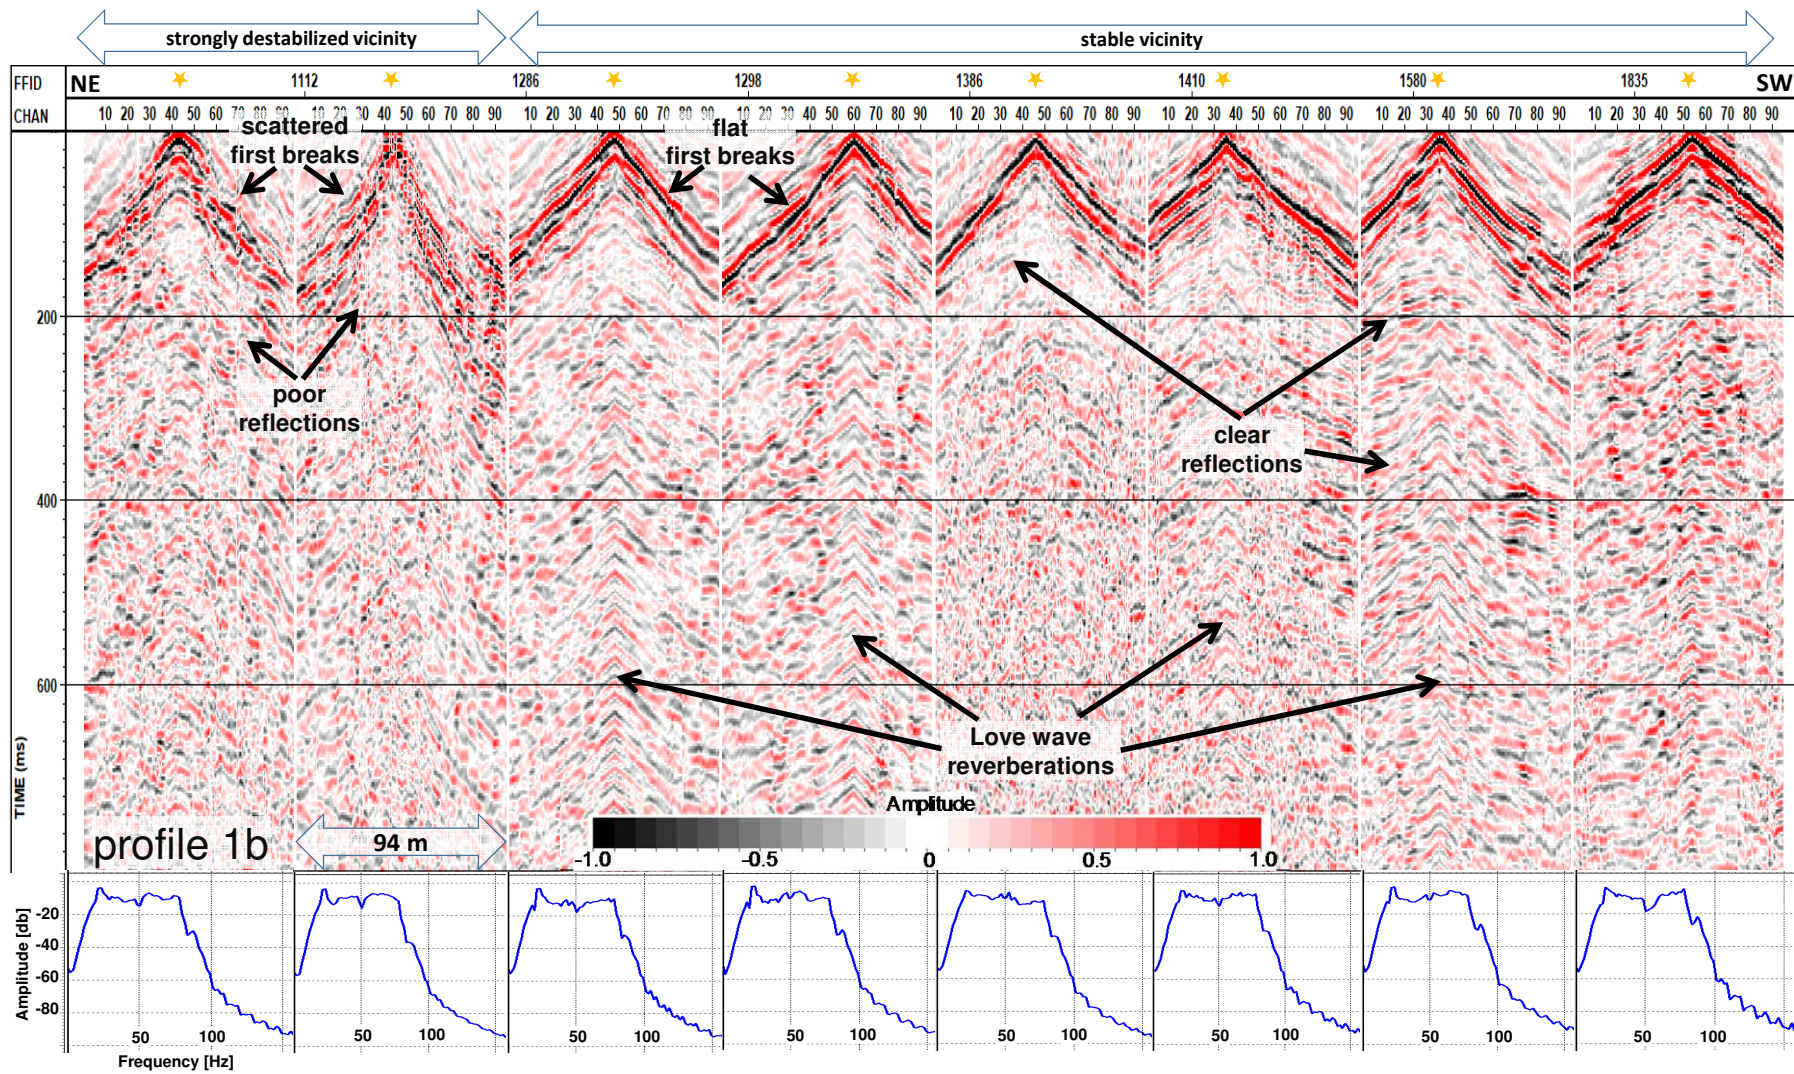

Polom et al., Figure 5, without bandpass filter



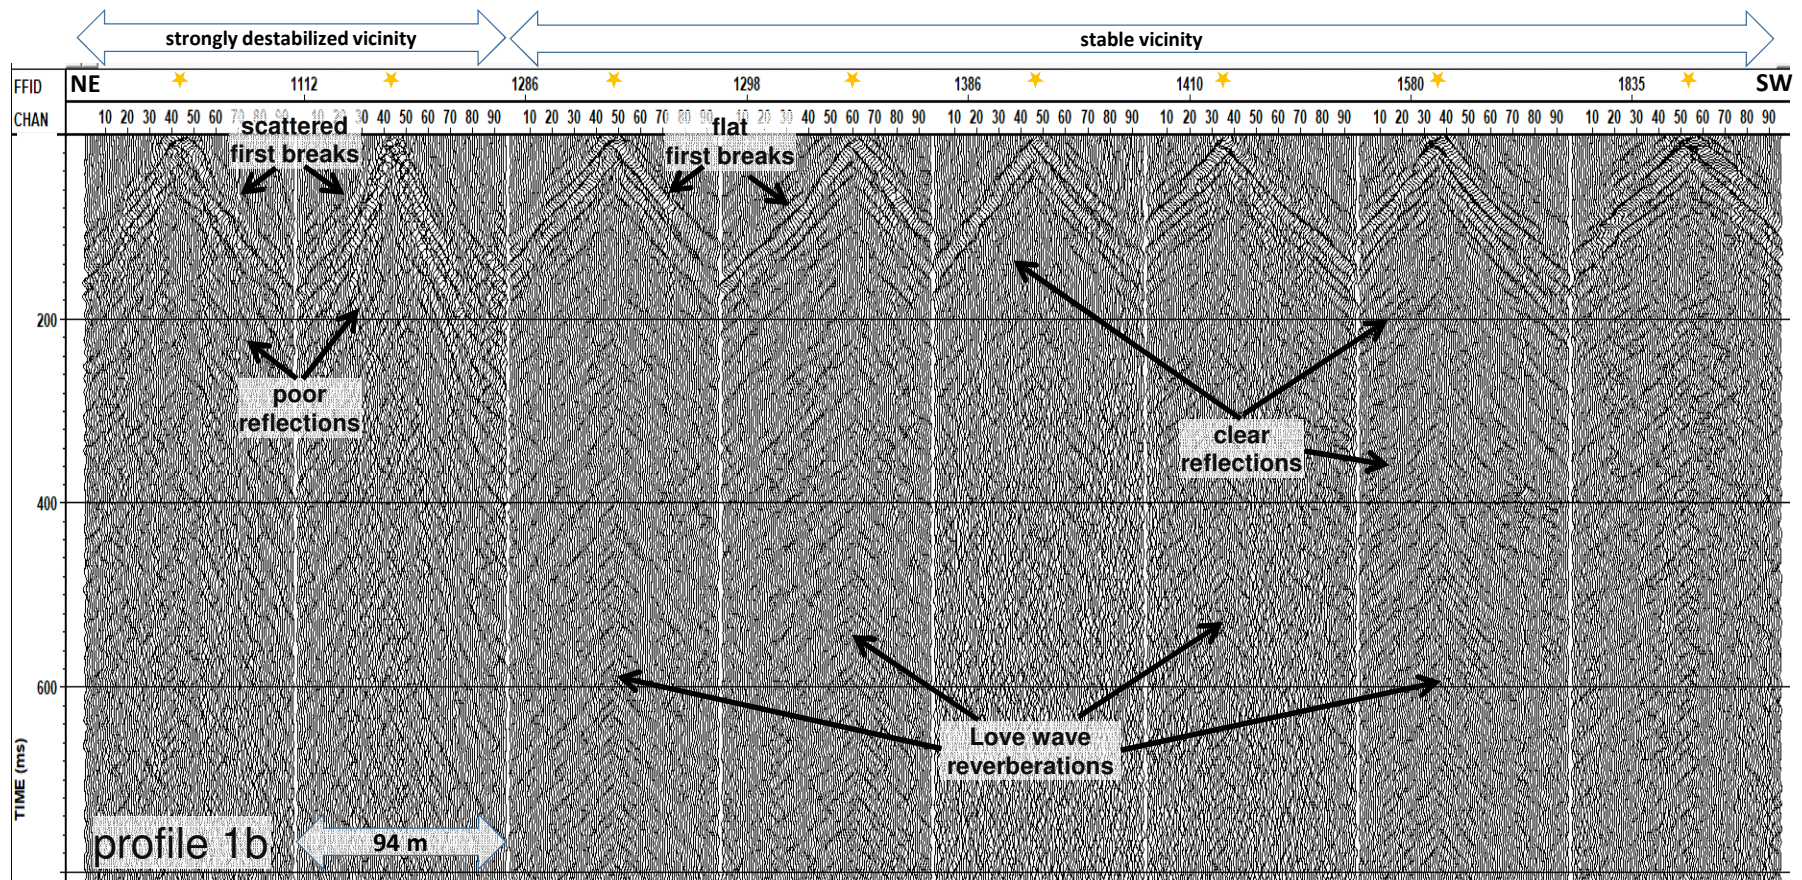

Polom et al., Figure 5, without bandpass filter, wiggle plotting mode
